# Supplementary material for: Predictive modelling of thrombus formation in diabetic retinal microaneurysms
Source: PubMed Central journal article supplement (PMC7481715; doi:10.1098/rsos.201102), 2020-08-26
Supplement: rsos201102_review_history.pdf [file rsos201102_review_history.pdf]

## **Predictive modelling of thrombus formation in diabetic retinal microaneurysms**

He Li, Konstantina Sampani, Xiaoning Zheng, Dimitrios P. Papageorgiou, Alireza Yazdani, Miguel O. Bernabeu, George E. Karniadakis and Jennifer K. Sun

### **Article citation details**

*R. Soc. open sci.* 7: 201102.

<http://dx.doi.org/10.1098/rsos.201102>

### **Review timeline**

Original submission: 29 June 2020

Final acceptance: 29 July 2020

Note: Reports are unedited and appear as submitted by the referee. The review history appears in chronological order.

Note: This manuscript was transferred from another Royal Society journal with peer review.

## Review History

### RSOS-201102.R0 (Original submission)

#### Review form: Reviewer 1 (Xiao Liu)

**Is the manuscript scientifically sound in its present form?**

Yes

**Are the interpretations and conclusions justified by the results?**

Yes

**Is the language acceptable?**

Yes

**Do you have any ethical concerns with this paper?**

Yes

**Have you any concerns about statistical analyses in this paper?**

No

**Recommendation?**

Accept as is

**Comments to the Author(s)**

The author made a series of amendments to my questions, which sounds a lot more reasonable, and has a certain basis. Although I still think that red blood cells and arterial deformation are important factors to consider, this article makes sense as a preliminary study of microarteries.

**Review form: Reviewer 2 (Gabor Zavodszky)****Is the manuscript scientifically sound in its present form?**

Yes

**Are the interpretations and conclusions justified by the results?**

Yes

**Is the language acceptable?**

Yes

**Do you have any ethical concerns with this paper?**

No

**Have you any concerns about statistical analyses in this paper?**

No

**Recommendation?**

Accept as is

**Comments to the Author(s)**

The authors have addressed my comments in a satisfactory way. I suggest to accept the manuscript for publication.

**Review form: Reviewer 3****Is the manuscript scientifically sound in its present form?**

Yes

**Are the interpretations and conclusions justified by the results?**

Yes

**Is the language acceptable?**

Yes

**Do you have any ethical concerns with this paper?**

No

**Have you any concerns about statistical analyses in this paper?**

No

**Recommendation?**

Accept as is

**Comments to the Author(s)**

The Authors satisfactorily addressed all the comments.

**Decision letter (RSOS-201102.R0)**

We hope you are keeping well at this difficult and unusual time. We continue to value your support of the journal in these challenging circumstances. If Royal Society Open Science can assist you at all, please don't hesitate to let us know at the email address below.

Dear Dr Li:

It is a pleasure to accept your manuscript entitled "Predictive modeling of thrombus formation in diabetic retinal microaneurysms" in its current form for publication in Royal Society Open Science. The comments of the reviewer(s) who reviewed your manuscript are included at the foot of this letter.

Please ensure that you send to the editorial office an editable version of your accepted manuscript, and individual files for each figure and table included in your manuscript. You can send these in a zip folder if more convenient. Failure to provide these files may delay the processing of your proof. You may disregard this request if you have already provided these files to the editorial office.

You can expect to receive a proof of your article in the near future. Please contact the editorial office ([openscience\\_proofs@royalsociety.org](mailto:openscience_proofs@royalsociety.org)) and the production office ([openscience@royalsociety.org](mailto:openscience@royalsociety.org)) to let us know if you are likely to be away from e-mail contact -- if you are going to be away, please nominate a co-author (if available) to manage the proofing process, and ensure they are copied into your email to the journal.

Due to rapid publication and an extremely tight schedule, if comments are not received, your paper may experience a delay in publication.

Please see the Royal Society Publishing guidance on how you may share your accepted author manuscript at <https://royalsociety.org/journals/ethics-policies/media-embargo/>.

Thank you for your fine contribution. On behalf of the Editors of Royal Society Open Science, we look forward to your continued contributions to the Journal.

Best regards,  
Lianne Parkhouse  
Editorial Coordinator  
Royal Society Open Science  
[openscience@royalsociety.org](mailto:openscience@royalsociety.org)

on behalf of Dr Kenta Ishimoto (Associate Editor) and Professor R. Kerry Rowe (Subject Editor).

Reviewer(s)' Comments to Author:

Reviewer: 1

Comments to the Author(s)

The author made a series of amendments to my questions, which sounds a lot more reasonable, and has a certain basis. Although I still think that red blood cells and arterial deformation are important factors to consider, this article makes sense as a preliminary study of microarteries.

Reviewer: 2

Comments to the Author(s)

The authors have addressed my comments in a satisfactory way. I suggest to accept the manuscript for publication.

Reviewer: 3

Comments to the Author(s)

The Authors satisfactorily addressed all the comments.

Follow Royal Society Publishing on Twitter: @RSocPublishing

Follow Royal Society Publishing on Facebook:

<https://www.facebook.com/RoyalSocietyPublishing.FanPage/>

Read Royal Society Publishing's blog: <https://blogs.royalsociety.org/publishing/>
